# Supplementary material for: Brief communication: Extraction of the wake induction and angle of attack on rotating wind turbine blades from PIV and CFD results
Source: Copernicus journal article supplement (doi:10.5194/wes-2017-43), 2017-10-04
Supplement: Supplementary file [file wes-2017-43-AC4-supplement.pdf]

# Reply to the remarks of the editor to the comments of referee #2 on the manuscript “Brief communication: extraction of the wake induction and angle of attack on rotating wind turbine blades from PIV and CFD results”

Iván Herráez, Elia Daniele and J. Gerard Schepers

We would like to thank the editor for his complementary remarks to the comments of referee #2. In the following, we present our replies.

## Comment

1. *The comments of reviewer 2 are generally in line with those by reviewer 1. But he also states that the issue, if your method really represents the real AOA, needs to be supported by data, before the paper can be accepted for publication. Please address this plus the remaining items pointed out by the reviewer in your reply.*

## Reply:

This issue is now extensively discussed in the paper and supported with data from references like Burton et al. [2011] as well as with an analytical derivation of the method in the appendix.

## References

T. Burton, D. Sharpe, N. Jenkins, and E. Bossanyi. *Wind Energy Handbook*. John Wiley & Sons, 2 edition, 2011.
